## RESEARCH ARTICLE

# Transcriptional responses to fluctuating thermal regimes underpinning differences in survival in the solitary bee *Megachile rotundata*

Alex S. Torson<sup>1,\*</sup>, George D. Yocum<sup>2</sup>, Joseph P. Rinehart<sup>2</sup>, William P. Kemp<sup>2</sup> and Julia H. Bowsher<sup>1</sup>

## ABSTRACT

The transcriptional responses of insects to long-term, ecologically relevant temperature stress are poorly understood. Long-term exposure to low temperatures, commonly referred to as chilling, can lead to physiological effects collectively known as chill injury. Periodically increasing temperatures during long-term chilling has been shown to increase survival in many insects. However, the transcripts responsible for this increase in survival have never been characterized. Here, we present the first transcriptome-level analysis of increased longevity under fluctuating temperatures during chilling. Overwintering post-diapause quiescent alfalfa leafcutting bees (*Megachile rotundata*) were exposed to a constant temperature of 6°C, or 6°C with a daily fluctuation to 20°C. RNA was collected at two different time points, before and after mortality rates began to diverge between temperature treatments. Expression analysis identified differentially regulated transcripts between pairwise comparisons of both treatments and time points. Transcripts functioning in ion homeostasis, metabolic pathways and oxidative stress response were up-regulated in individuals exposed to periodic temperature fluctuations during chilling. The differential expression of these transcripts provides support for the hypotheses that fluctuating temperatures protect against chill injury by reducing oxidative stress and returning ion concentrations and metabolic function to more favorable levels. Additionally, exposure to fluctuating temperatures leads to increased expression of transcripts functioning in the immune response and neurogenesis, providing evidence for additional mechanisms associated with increased survival during chilling in *M. rotundata*.

**KEY WORDS:** Chill injury, Fluctuating thermal regime, *Megachile rotundata*, RNA-seq, Temperature stress

## INTRODUCTION

Insects have evolved the ability to cope with harsh, long-term environmental conditions by using an array of physiological and behavioral responses. One of the most common defenses against unfavorable environmental conditions is the physiological state known as diapause, a life-history strategy characterized by diminished metabolic activity and a hiatus in development. While diapause offers a level of protection against seasonal stress, such as cold winter temperatures, exposure can still take a physiological toll

when temperatures are abnormally low or when winter lasts for a long time (Hayward et al., 2014; Renault et al., 2004; Teets and Denlinger, 2013).

Exposure to low temperatures, also known as chilling, can have a wide range of physiological effects (Teets and Denlinger, 2013). The physiological effects associated with long-term chilling, such as exposure to winter conditions, are known as indirect chill injuries and have been associated with gradual failure of homeostatic processes (Lee, 2010). The downstream consequences of this phenomenon are likely to be complex, but disruption of ion homeostasis and metabolic imbalance are probable outcomes (Kostal, 2004; Košťál et al., 2006). Additionally, chill injury has been associated with the occurrence of oxidative stress (Lalouette et al., 2011; Rojas and Leopold, 1996).

While the accumulation of chill injuries can have a significant effect on the well being of the insect, periodically increasing temperatures during long-term chilling can allow for an increase in survival (Colinet et al., 2006; Coulson and Bale, 1996; Rinehart et al., 2011, 2013). These periodic increases in temperature, commonly known as fluctuating thermal regimes (FTRs), have been implicated in the repair of, or protection against, chill injury during exposure to low temperatures and have been observed across insect life stages and taxa (Košťál et al., 2007; Renault et al., 2004). Despite the common physiological mechanism associated with chill injury and its repair, few studies have measured the chill injury response at the level of gene expression (Hayward et al., 2014).

The alfalfa leafcutting bee *Megachile rotundata* is widely used in alfalfa seed production agroecosystems and provides an excellent model for assessing changes in gene expression during chilling. Adult *M. rotundata* generally emerge during early summer. Soon after emergence, the females mate once and begin provisioning brood cells (Pitts-Singer and Cane, 2011). Larvae develop within their brood cells until the fifth instar. At this point, they defecate and enter diapause as prepupae and remain dormant through the winter (Michener, 2007). Development resumes as temperatures warm in late spring or early summer; bees pupate and later emerge as adults (Pitts-Singer and Cane, 2011). Diapause in *M. rotundata* often terminates before harsh environmental conditions end and is followed by a physiological state known as post-diapause quiescence (Yocum et al., 2005, 2006). Although quiescent individuals are responsive to warmer temperatures, they maintain the cold tolerance that is characteristic of diapause (Hayward et al., 2005). Quiescent individuals may be roused to continue development, but will stay quiescent until more favorable conditions arise (Košťál, 2006).

The harsh winter temperatures experienced by *M. rotundata* during diapause and post-diapause quiescence have the potential to cause chill injury in both natural populations and commercial-use bees. In managed populations, diapausing individuals are typically

<sup>1</sup>North Dakota State University, Department of Biological Sciences, P.O. Box 6050, Fargo, ND 58108, USA. <sup>2</sup>USDA-ARS Red River Valley Agricultural Research Center, Biosciences Research Laboratory, 1605 Albrecht Boulevard, Fargo, ND 58102-2765, USA.

\*Author for correspondence (Alex.S.Torson@ndsu.edu)

Received 24 September 2014; Accepted 26 January 2015

**List of abbreviations**

|         |                                         |
|---------|-----------------------------------------|
| CPY     | cytochrome P450                         |
| DGD     | development, growth and differentiation |
| FTR     | fluctuating thermal regime              |
| GO      | gene ontology                           |
| IH      | ion homeostasis                         |
| ILE     | implicated in life expectancy           |
| IR      | immune response                         |
| NA      | neurogenesis activity                   |
| OS      | oxidative stress                        |
| qPCR    | quantitative real-time PCR              |
| RNA-seq | high-throughput mRNA sequencing         |
| ROS     | reactive oxygen species                 |
| STR     | static thermal regime                   |
| Vg      | vitellogenin                            |

overwintered at a constant temperature of 4–6°C (Pitts-Singer and Cane, 2011). Individuals reared under constant, low temperatures over long periods of time likely experience an accumulation of chill injuries, eventually leading to an increase in mortality (Kostal, 2004; Košťál et al., 2007). When exposed to daily fluctuations to a warmer temperature (20°C) during chilling, *M. rotundata* shows a dramatic decrease in mortality, and this decrease is maintained for many months (Rinehart et al., 2013). After extended exposure to fluctuating temperatures, emerging adults have no significant differences in quality compared with control (Bennett et al., 2013; Rinehart et al., 2013). This result suggests that fluctuating temperatures provide a protective effect during chilling, alleviating sub-lethal effects associated with long-term low constant temperature exposure. We hypothesized that: (1) long-term exposure to low temperatures causes chill injury and that subsequent exposure to fluctuating temperatures provides a protective effect by repairing and/or diminishing the effect of chill injury; and that (2) this protective effect is a result of a decrease in oxidative stress and a return to more favorable ion concentrations and metabolic rates.

In this study, we screened for the transcripts responsible for the differences in survival between individuals reared under either constant or fluctuating temperatures. RNA samples extracted from post-diapause quiescent prepupae were harvested from individuals reared under both temperature treatments before and after mortality rates began to diverge. Treatment- and time-specific transcriptome profiles were assessed using RNA-seq on the Illumina platform. We predicted: (1) that a larger quantity of

transcripts would be differentially expressed in late-sampled individuals, after mortality diverged; and (2) that transcripts functioning in a stress response (i.e. oxidative stress pathways) and those functioning in diminishing other sub-lethal effects associated with chill injury would be up-regulated in individuals exposed to fluctuating temperatures.

**RESULTS****Transcriptome assembly**

Individuals were harvested for RNA-seq at two time points: (1) after 12 months in storage, before mortality rates diverge between temperature treatments and (2) 2 months later, after mortality had significantly decreased under constant temperatures (Fig. 1A; modified from Rinehart et al., 2013). For simplicity, individuals selected before mortality diverged will be referred to as ‘early’ and those selected after mortality diverged will be referred to as ‘late’ (Fig. 1B). Exposure to constant temperatures will be referred to as STR (static thermal regime), and exposure to fluctuating temperatures as FTR (fluctuating thermal regime) in all subsequent figures and tables. Twelve individual RNA-seq libraries (accession number: SRP047335) consisting of an early and late time point for each treatment with three biological replicates for each were generated, averaging 62,774,914 pair-end reads per library (Table 1). Both the percentage of raw reads mapped and the percentages of reads properly paired with its mate were used as initial quality metrics of the assembly. On average, approximately 80% of the raw reads generated mapped to the *M. rotundata* genome (accession number: PRJNA66515); of these, 88%, on average, could be properly paired with its mate (Table 1).

**Differential expression analysis**

Four pair-wise comparisons were deemed biologically relevant because they either directly compare expression profiles of one treatment at two time points or compare the differences between two treatments in the same time point (Fig. 1B). Differential expression analysis was conducted using the Tuxedo protocol (Trapnell et al., 2012). Transcripts with an absolute value greater than or equal to  $\log_2 2$  ( $\alpha=0.05$ ) were selected for downstream analysis. With this conservative significance threshold, 287 differentially expressed genes were identified among the four biologically relevant comparisons. We confirmed 79 comparisons (both differentially expressed and not) from the expression analysis using quantitative real-time PCR (qPCR; supplementary

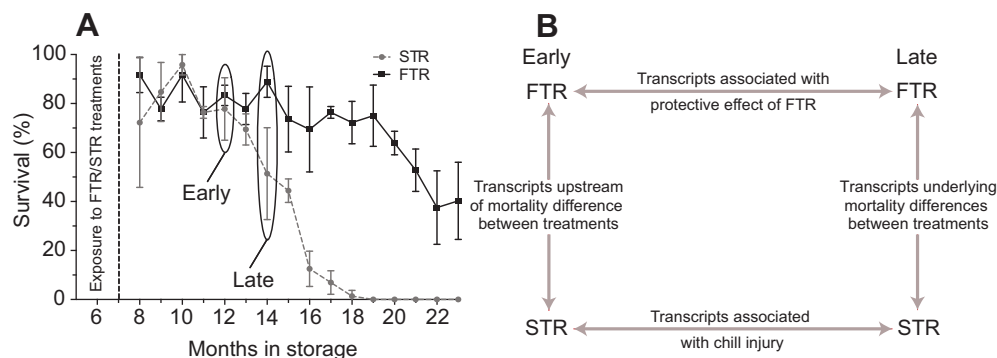

**Fig. 1. Survival rates of the solitary bee *Megachile rotundata* under temperature treatments and experimental comparisons.** (A) Post-diapause quiescent prepupae exposed to fluctuating temperatures (black, FTR) have higher levels of survival than those exposed to constant 6°C (gray, STR; modified from Rinehart et al., 2013). The fluctuating temperature protocol consisted of 21 h at 6°C, with a daily 1 h pulse at 20°C and two 1 h ramps. Survival is defined as successful development and emergence as an adult. RNA seq samples were collected after 12 months in storage (early) and again 2 months later (late), as indicated by circles. Values are means $\pm$ s.e.m. (B) Diagram illustrating all differential expression pair-wise comparisons and primary goal of each comparison.

**Table 1. Raw, paired-end RNA-seq reads from each biological replicate were mapped to the *M. rotundata* genome**

| Biological replicate | Total paired-end reads | Reads mapped to genome | Reads mapped (%) | Reads properly paired (%) | Singletons (%) |
|----------------------|------------------------|------------------------|------------------|---------------------------|----------------|
| Early_STR_1          | 64,560,308             | 51,204,141             | 79.31%           | 88.90%                    | 6.86%          |
| Early_STR_2          | 54,782,127             | 42,599,350             | 77.76%           | 88.99%                    | 7.19%          |
| Early_STR_3          | 59,506,886             | 47,458,404             | 79.75%           | 88.65%                    | 7.04%          |
| Early_FTR_1          | 37,978,827             | 29,176,612             | 76.82%           | 86.31%                    | 7.58%          |
| Early_FTR_2          | 63,582,685             | 49,534,551             | 77.91%           | 88.65%                    | 7.12%          |
| Early_FTR_3          | 53,545,275             | 42,999,071             | 80.30%           | 88.25%                    | 7.12%          |
| Late_STR_1           | 70,934,170             | 59,354,375             | 83.68%           | 87.48%                    | 6.80%          |
| Late_STR_2           | 69,922,574             | 56,056,522             | 80.17%           | 87.88%                    | 6.89%          |
| Late_STR_3           | 79,473,779             | 64,792,233             | 81.53%           | 88.27%                    | 6.69%          |
| Late_FTR_1           | 51,322,443             | 40,532,597             | 78.98%           | 87.99%                    | 7.30%          |
| Late_FTR_2           | 65,924,838             | 51,883,396             | 78.70%           | 88.18%                    | 7.00%          |
| Late_FTR_3           | 81,765,052             | 67,250,268             | 82.25%           | 86.33%                    | 7.32%          |
| Mean                 | 62,774,914             | 50,236,793             | 79.76%           | 87.99%                    | 7.08%          |

Each biological replicate was RNA from a single individual.

material Table S1). RNA samples assessed for qPCR validation originated from different individuals than the ones subjected to RNA-seq, providing an independent confirmation of expression differences.

In differential expression analysis, multiple transcripts may represent a single gene locus. The Tuxedo protocol averages expression values for each transcript from a gene to give the fold change value for the gene (i.e. each gene is an average of all transcripts at that locus). To include the identities of each individual transcript in downstream analyses (319 among all four biologically relevant comparisons), each transcript was treated as a unique entity for analysis and is included in all of the following iterations and numerical representations of the data.

#### Quantification of differentially expressed transcripts

The expression profiles show a clear asymmetry in the distribution of differentially expressed transcripts among comparisons (Fig. 2). The largest number of differentially expressed transcripts came from the comparison of individuals exposed to either constant or fluctuating temperatures before mortality diverged (Fig. 2A). We had predicted that the greatest number of differentially expressed transcripts would occur after mortality diverged because of the marked difference in mortality at that time. However, only 63 transcripts were differentially expressed at the later time point. The larger number of differentially expressed transcripts in the early comparison (217) indicates that expression profiles are changing months before observable changes in bee quality.

Few differentially expressed transcripts were identified for the within-treatment comparisons (i.e. early STR versus late STR) for both constant and fluctuating temperatures (12 and 22 transcripts, respectively; Fig. 2B). The low number of differentially expressed transcripts indicates that the profiles of samples sequenced in each treatment over the two dates are relatively static between the time points sampled. This stasis could be due to either the emergence of large-scale differences before the time-points sampled, or relatively few transcripts regulating the physiological response to the temperature treatments.

Venn diagrams were used to identify differentially expressed transcripts among the four biologically relevant comparisons that were unique either temperature treatments or time points sampled (Fig. 3). Differentially expressed transcripts in early STR versus early FTR, the comparison with highest distribution of differentially expressed transcripts (67.8%), shared 23 of its 215 differentially expressed transcripts with the late STR versus late FTR comparison (Fig. 3A). These 23 transcripts (22 up-regulated, 1 down-regulated)

are specific to individuals reared under fluctuating temperatures before and after mortality diverged (Fig. 3A). Because the direction of regulation is relative to the second treatment in each comparison, an FTR-specific up-regulated transcript is also a down-regulated STR-specific transcript.

In addition to identifying transcripts differentially expressed in animals exposed to the FTR treatment across time, the Venn diagrams identified up- and down-regulated transcripts that are unique to each comparison. For example, 43 down-regulated transcripts were unique to the early STR versus early FTR comparison (Fig. 1B) and 36 transcripts were up-regulated in late STR versus late FTR that were not shared with any other comparison (Fig. 1C). Distinctive transcriptional differences exist between treatments within time points.

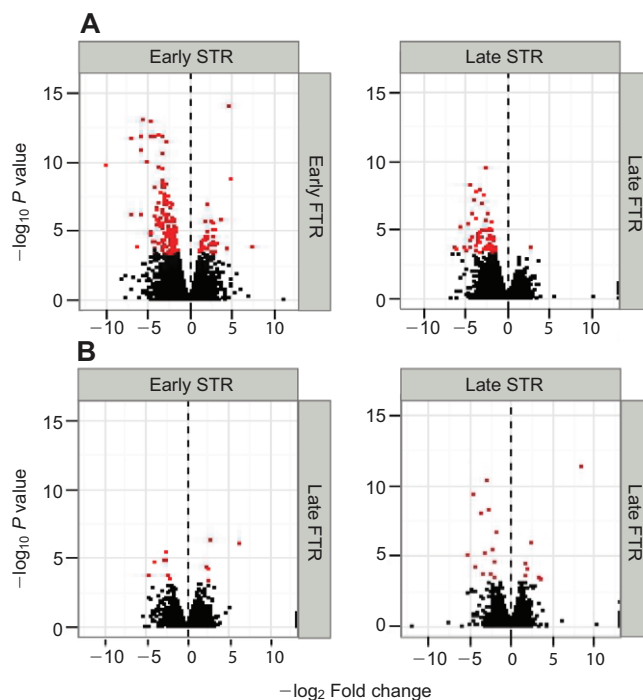

**Fig. 2. Differential expression profiles between temperature treatments.** Transcripts were plotted by fold change ( $\log_2$ ) in expression and the log of the  $P$ -value for each comparison. Red points indicate transcripts that have significantly different expression between samples. Statistical significance was set at  $\log_2$  ( $\alpha=0.05$ ). (A) Within-time-point comparisons; (B) within-treatment comparisons.

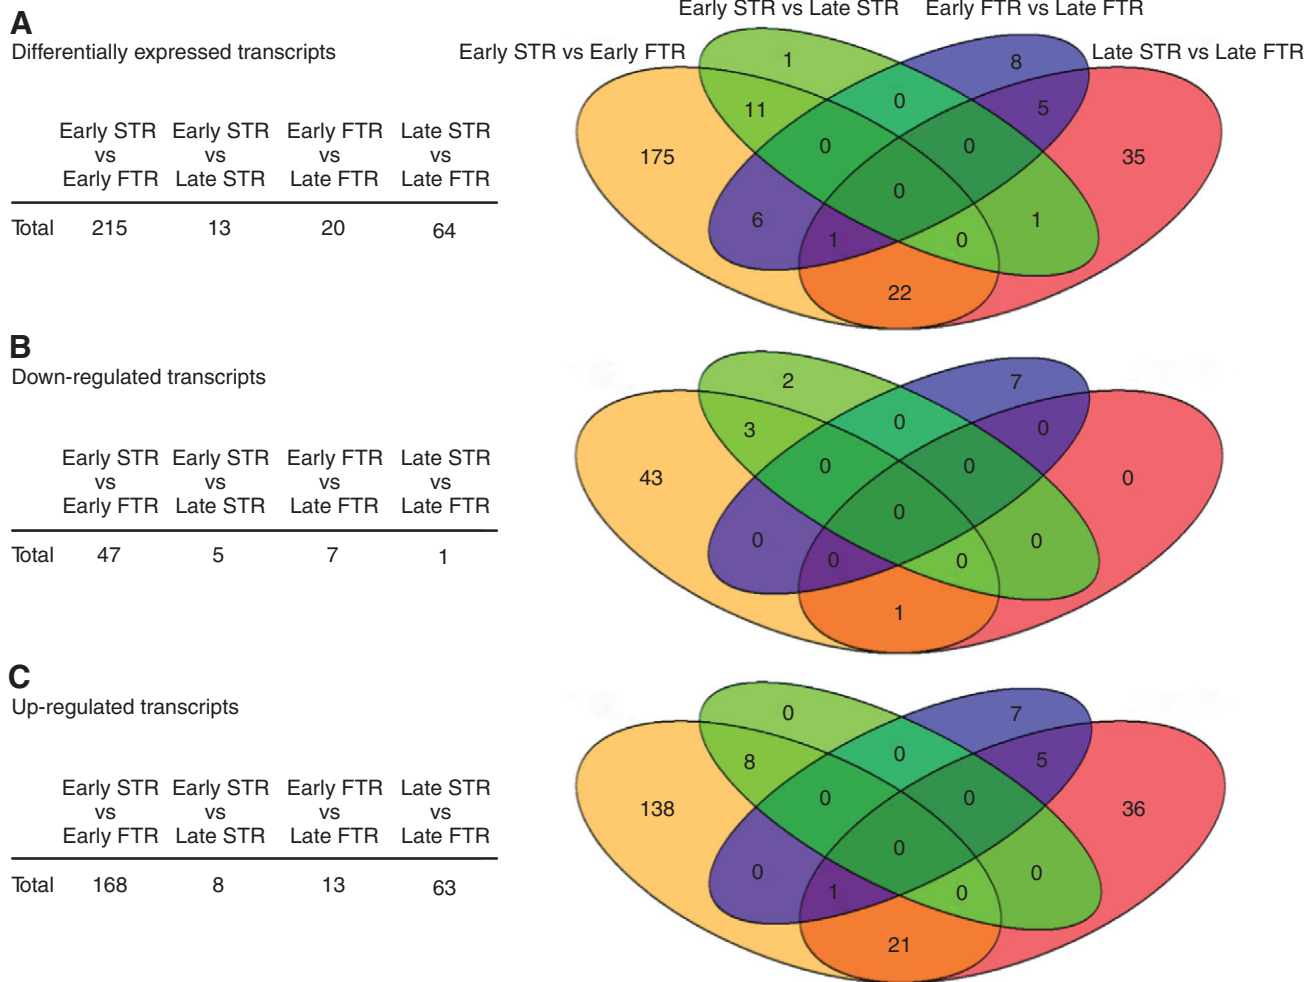

**Fig. 3. Overlap of differentially expressed transcript profiles among biologically relevant comparisons.** (A) Overall profile of differentially expressed transcripts, (B) profile of down-regulated transcripts and (C) profile of up-regulated transcripts. The direction of up- or down-regulation is relative to the second treatment in each comparison (e.g. in the early STR versus early FTR comparison, up- or down-regulation is relative to early FTR). When looking at interactions between comparisons, the same holds true; the interaction between, for example, up-regulated transcripts in early STR versus early FTR and late STR versus late FTR identifies transcripts that are up-regulated in both early FTR and late FTR. The numbers in B and C do not necessarily add up to the totals shown in A because directionality of regulation is not taken into consideration in A and a transcript shared in that comparison may be up-regulated in one comparison and down-regulated in the other. The tables to the left of each Venn diagram indicate total number of differentially expressed transcripts in each comparison.

### Gene ontology

A gene ontology (GO) analysis, conducted using Blast2GO (Conesa et al., 2005), revealed an abundance of transcripts functioning in oxidative stress, various metabolic functions, ion homeostasis, neurogenesis immune response and several functioning in growth and development (Table 2; supplementary material Table S2). These transcripts are up-regulated before mortality diverged between temperature treatments. An ontological analysis of the 63 differentially expressed transcripts after mortality diverged (late STR versus late FTR) shows an up-regulation of transcripts functioning in similar GO classes to the earlier comparison (early STR versus early FTR). Twenty-three of the 63 differentially expressed transcripts (36.5%) in late-sampled individuals were also differentially expressed in early-sampled individuals (supplementary material Table S3).

### DISCUSSION

Chilling can be deadly to insects, but periodic warm pulses during chilling can partially alleviate the damage of chill injury. The gene

expression changes associated with the protective effects of these warm pulses are unknown. Assessing gene expression changes during chilling will provide validation of the already-established physiological responses and may elucidate additional mechanisms that have not been previously identified. Here, we present the first transcriptome-level analysis of increased survival under fluctuating temperatures during chilling. *Megachile rotundata* were exposed to either a constant, low temperature (6°C) or the same low temperature with a daily fluctuation in temperature to 20°C. When reared under these conditions, individuals exposed to daily temperature fluctuations show a marked increase in survival, suggesting some type of physiological benefit to periodic deviations away from constant, low temperature exposure. We hypothesized that prolonged exposure to a constant temperature leads to indirect chill injury in *M. rotundata*, and further, that the increase in survival in bees that were exposed to fluctuations in temperature during post-diapause quiescence would be the result of a decrease in the physiological stressors associated with chill injury.



**Table 2. Gene ontology of transcripts up-regulated in early-sampled individuals exposed to fluctuating temperatures**

| Function | Transcript                                                 | Fold change (log <sub>2</sub> ) | Transcript ID |
|----------|------------------------------------------------------------|---------------------------------|---------------|
| OS       | Eater                                                      | 5.68004                         | MROT_00005566 |
| OS       | Cytochrome p450 9e2                                        | 5.1244                          | MROT_00000298 |
| OS       | Cytochrome p450                                            | 4.33939                         | MROT_00002167 |
| OS       | Peroxidase                                                 | 3.77461                         | MROT_00000781 |
| OS       | Cytochrome p450 9e2-like                                   | 3.66962                         | MROT_00002409 |
| OS       | Cytochrome p450 6k1-like                                   | 3.09328                         | MROT_00001509 |
| OS       | Apolipoprotein d-like                                      | 3.07233                         | MROT_00001974 |
| OS       | Cytochrome p450 9e2                                        | 2.98918                         | MROT_00006118 |
| OS       | Probable cytochrome p450 304a1-like                        | 2.95969                         | MROT_00000630 |
| OS       | Short-chain dehydrogenase reductase family 16c member 6    | 2.91369                         | MROT_00005918 |
| OS       | Vitellogenin                                               | 2.82886                         | MROT_00006912 |
| OS       | Glutathione S-transferase                                  | 1.79271                         | MROT_00006349 |
| OS       | Nuclear protein 1-like                                     | 1.40276                         | MROT_00003724 |
| NA       | Neuroigin-x-linked                                         | 6.91741                         | MROT_00001836 |
| NA       | Neuroigin-y-linked                                         | 6.79666                         | MROT_00010474 |
| NA       | Low quality protein: dynein heavy chain axonemal-like      | 6.14084                         | MROT_00005641 |
| NA       | Neuropilin and tolloid-like protein 2                      | 3.98551                         | MROT_00010652 |
| NA       | Neuropilin and tolloid-like protein 2-like                 | 3.98551                         | MROT_00004515 |
| NA       | Synaptic vesicle glycoprotein 2b-like                      | 3.70427                         | MROT_00004806 |
| NA       | Neurexin isoform e                                         | 3.63132                         | MROT_00005162 |
| NA       | Slit homolog 1                                             | 3.30025                         | MROT_00008863 |
| NA       | Roundabout-like protein 1                                  | 3.25388                         | MROT_00005643 |
| NA       | Division abnormally delayed                                | 2.64979                         | MROT_00001457 |
| NA       | Vasodilator-stimulated phosphoprotein                      | 2.61012                         | MROT_00002561 |
| NA       | Growth differentiation factor partial                      | 2.42894                         | MROT_00002522 |
| NA       | Growth differentiation factor 11                           | 2.42894                         | MROT_00002523 |
| NA       | Cathepsin l-like                                           | 1.82219                         | MROT_00002252 |
| DGD      | Multiple epidermal growth factor-like domains 10           | 5.68004                         | MROT_00010746 |
| DGD      | Myosin light chain 2                                       | 2.92318                         | MROT_00005203 |
| DGD      | Low density lipoprotein                                    | 2.33347                         | MROT_00004517 |
| DGD      | Juvenile hormone epoxide hydrolase 1-like                  | 2.13856                         | MROT_00008229 |
| DGD      | Calponin transgelin                                        | 1.97253                         | MROT_00004619 |
| DGD      | Growth differentiation factor 8-like                       | 1.82621                         | MROT_00001549 |
| DGD      | Actin-related protein 2,3 complex subunit 3-like           | 1.81918                         | MROT_00007141 |
| DGD      | Myosin heavy muscle isoform 1                              | 1.63627                         | MROT_00007351 |
| DGD      | Dynein light chain cytoplasmic-like                        | 1.54322                         | MROT_00009419 |
| IR       | Melanization-related protein                               | 4.50645                         | MROT_00000056 |
| IR       | Protein toll                                               | 2.63557                         | MROT_00000828 |
| IR       | Gram-negative bacteria-binding protein 1-2                 | 2.50276                         | MROT_00001750 |
| IR       | Lysozyme 3-like                                            | 2.05522                         | MROT_00007603 |
| IR       | Serine protease snake-like                                 | 1.79965                         | MROT_00003557 |
| IH       | Solute carrier family 41 member 2-like                     | 3.73825                         | MROT_00002378 |
| IH       | Transferrin                                                | 3.1507                          | MROT_00006050 |
| IH       | Cysteine dioxygenase type 1-like                           | 3.07038                         | MROT_00002818 |
| IH       | High-affinity camp-specific 3 -cyclic phosphodiesterase 7a | 2.79103                         | MROT_00010152 |
| IH       | Muscle lim protein mlp84b-like                             | 2.33141                         | MROT_00005271 |
| IH       | Ring finger-containing                                     | 2.21141                         | MROT_00009879 |
| IH       | Ring-h2 finger protein at180-like                          | 1.95467                         | MROT_00005615 |
| IH       | Sparc                                                      | 1.91621                         | MROT_00009818 |
| IH       | Sodium hydrogen exchanger 7-like                           | 1.77648                         | MROT_00000887 |
| IH       | Acidic mammalian chitinase-like                            | 1.75997                         | MROT_00007455 |
| JH       | 1-phosphatidylinositol-bisphosphate phosphodiesterase      | 1.74737                         | MROT_00001826 |
| IH       | Inositol-trisphosphate receptor                            | 1.59498                         | MROT_00009217 |
| ILE      | DNA fragmentation factor subunit beta-like                 | 2.60731                         | MROT_00002328 |
| ILE      | Creb aff bzip transcription                                | 1.63111                         | MROT_00006656 |

OS, oxidative stress; NA, neural activity; DGD, development, growth and differentiation; IR, immune response; IH, ion homeostasis; ILE, implicated in life expectancy. These transcripts are a subset of all differentially expressed transcripts.

First, we predicted that more transcripts would be differentially expressed in late-sampled individuals, after mortality diverged. However, differential expression analysis reveals an opposite trend; the greatest quantity of differentially expressed transcripts occurred in early-sampled individuals, before any significant differences in mortality were observed. This result suggests that sub-lethal effects accumulate prior to significant mortality in the constant-temperature-reared population. The relatively small within-

treatment changes in expression profiles between the two time points, in both FTR and STR, also support the hypothesis that the physiological mechanisms responsible for counteracting the accumulation of sub-lethal effects are set into motion earlier in extended post-diapause quiescence. Additional RNA-seq sampling or extensive quantitative real-time PCR (qPCR), over a longer developmental interval, starting further upstream from this analysis, would be necessary to validate this hypothesis.

Our second prediction was that transcripts functioning in a stress response and those functioning in diminishing other sub-lethal effects associated with chill injury would be up-regulated as a result of exposure to fluctuating temperatures. We discovered transcripts functioning in ion and metabolic imbalance, which have been hypothesized to result in sub-lethal effects, and several with antioxidant properties; results that are in agreement with our initial predictions. Interestingly, several other classes of transcripts were up-regulated in individuals reared under constant temperatures, suggesting additional mechanisms for coping with stresses related to long-term low temperature exposure.

### **Ion and metabolic imbalance resulting from membrane phase transitions**

Chill injury and subsequent mortality have been associated with aberrations in ion homeostasis and metabolic imbalance in several insect species (Košťál, 2006; Košťál et al., 2007; Lalouette et al., 2011; Macmillan et al., 2012). Disturbances in ion homeostasis could help to explain some of the large-scale physiological effects seen in chill-injured insects such as abnormal muscle contraction (Yocum et al., 1994) and atypical neuronal function (Hosler et al., 2000).

Our GO analysis revealed that an abundance of transcripts involved in counteracting disruptions of ion homeostasis and energy metabolism (including lipid metabolism) (Tables 2; supplementary material Table S2), both of which have been implicated as molecular components of chilling injury physiology (Hayward et al., 2014). The return of more favorable concentrations of ions within the organisms exposed to fluctuations in temperature may provide protection against failure of neuromuscular coordination in chill-injured individuals. These results suggest that the up-regulation of these transcripts under exposure to fluctuating temperatures may allow for protection against, or repair of, chill injury and, thus, lead to an increase in survival.

### **Neurological benefits of fluctuating temperatures**

Traditionally, the most obvious symptom of chill injury has been loss of coordination such as defects in crawling behaviors (Hazell and Bale, 2011). This physiological impact suggests a neurological consequence of chilling. In individuals exposed to fluctuating temperatures during quiescence, a total of 14 transcripts (Table 2) functioning in neurological patterning and development were up-regulated in early sampled individuals and either were maintained or up-regulated further after mortality rates began to diverge. The maintenance of these expression profiles through the two time points suggests, again, that these transcripts are playing a role over time, even when mortality has already diverged.

The up-regulation of these transcripts in fluctuating temperature-reared individuals suggest one of two mechanisms: either these transcripts are functioning in the repair of damage caused by chill injury or they are functioning in normal neurological development and exposure to constant chilling causes a phenocopy defect, impeding normal developmental processes during this life stage. Phenocopy defects were originally used to describe morphological deformities in *Drosophila* exposed to stressful environmental conditions during development (Goldschmidt, 1935). Phenocopy defects are common under high temperature stress (Mitchell and Lipps, 1978; Mitchell et al., 1979). The mechanisms responsible for the physiology associated with high- and low-temperature stress show some overlap (Yocum et al., 1994), indicating that decreased survival in individuals injured by chilling may be the result of phenocopy defects. A phenocopy-defect-centric hypothesis would

suggest that the suspension of normal developmental processes might be a factor to increased mortality between the two treatments. The blocking of development during the STR treatment may lead to additional stresses not previously associated with chill injury. The initiation of transcription associated with developmental processes in the FTR treatment may mitigate this phenocopy defect.

Current estimates of the developmental threshold in *M. rotundata* range from 15.7–19.0°C (Kemp and Bosch, 2000; Whitfield and Richards, 1992). While these estimates, even at the upper bound, are still below the 20°C pulse experienced during the FTR protocol, although only by as little as one degree, it has been shown that it is not possible for *M. rotundata* to complete development at 18°C and show greatly delayed development and increased mortality at 22°C (Kemp and Bosch, 2000). While 20°C is indeed above *M. rotundata*'s developmental threshold, the individuals harvested for the RNA-seq assay had not yet moved into the next developmental stage (pupation) and any developmental processes occurring during the exposure to the FTR treatment are not sufficient to lead to gross morphological changes in the animal. Although large-scale morphological changes were not witnessed in *M. rotundata* as a result of the FTR treatment, we recognize that smaller-scale developmental processes may still be occurring.

In addition to those functioning in neurogenesis, the up-regulation of transcripts functioning in other aspects of development, growth, or cell differentiation (Table 2) provide additional evidence that fluctuating temperatures may allow for normal development in preparation for pupation and adult development. Conventionally, diapause and post-diapause quiescence have been thought of as developmentally inert, but the idea that these life stages are more developmentally dynamic, have started to gain momentum (Košťál, 2006); our data provide support for this paradigmatic shift. The up-regulation of these developmental transcripts also argues for a role in the prevention of phenocopy defects caused by sub-optimal environmental conditions.

### **Oxidative stress as a component of chill injury**

The low temperatures experienced during chilling may have the capacity to reduce the effectiveness of antioxidant enzymes (Joanisse and Storey, 1996), and thus contribute to chill injury through oxidative stress, causing damage to DNA, protein and lipid molecules (Monaghan et al., 2009). In adult *Alphitobius diaperinus*, exposure to fluctuating temperatures during chilling has been associated with decreased levels of reactive oxygen species (ROS) when compared with individuals reared under constant low temperatures (Lalouette et al., 2011).

In this study, we found a number of transcripts functioning in oxidation stress response, including *Peroxidase*, and *Glutathione S-transferase*, and several from the *Cytochrome P450 (CYP)* superfamily (Table 2). These transcripts were up-regulated in early-sampled individuals reared under fluctuating temperatures and maintained in late-sampled individuals. Exposure to environmental stressors (i.e. low temperature stress), has been associated with malfunctioning in mitochondrial respiration and the production of peroxide (Prasad et al., 1994). The up-regulation of *Peroxidase* witnessed in *M. rotundata* may serve to diminish the resulting oxidative stress associated with the aforementioned metabolic malfunction. During exposure to low temperatures, the function of antioxidant enzymes, such as those belonging to the CYP superfamily, can be diminished; leading to an increase in ROS present in the cell (Baek and Skinner, 2003). The increased expression of *CPY* transcripts suggests that exposure to fluctuating temperatures may help to counteract this decreased efficiency.

Furthermore, other transcripts with antioxidant properties and associations with insect survival were up-regulated when *M. rotundata* were exposed to fluctuating temperatures. *Vitellogenin (Vg)*, which has been implicated in caste-specific differences in longevity in honeybees and has antioxidant properties (Corona et al., 2007) and *Apolipoprotein D-like*, another transcript associated with oxidative stress and survival in *Drosophila* (Walker et al., 2006), were both up-regulated. The up-regulation of these transcripts again supports our hypothesis that a reduction of oxidative stress plays a role in increased survival caused by fluctuating temperatures during chilling.

Increased cellular membrane damage via an accumulation of ROS to stressful levels may be associated with damage to mitochondrial membranes and may exacerbate ion and metabolic imbalances that have previously been correlated with chilling injury in other insects. Our results suggest that individuals reared under constant, low temperatures may be experiencing elevated levels of ROS and that a periodic increase in temperature may help alleviate the resulting oxidative stress via up-regulation of antioxidants.

### Immune function may play a role in survival during chilling

Several other functional classes of transcripts that have not previously been linked to chill injury, including those functioning in growth and development and immune response, were up-regulated in early-sampled individuals exposed to fluctuating temperatures and were maintained in late-sampled individuals. These additional functional classes provide mechanisms leading to increased survival that have not been previously associated with a chill injury response.

Environmental stressors, such as temperature, have been associated with a decrease in immune function across taxa through trade-offs in life history strategies (Lochmiller and Deerenberg, 2000). For example, temperature stress in *M. rotundata* decreases the immune response to chalkbrood disease caused by *Ascospaera aggregata* (Xu and James, 2012). Our study revealed a similar suite

of transcripts expressed at increased levels when individuals were exposed to fluctuating temperatures, suggesting that chilling may decrease immune function and may be associated with a decrease in survival. Transcripts such as *Serine protease snake-like*, *Protein Toll* and *Melanization-related protein*, which were differentially expressed in our study (Table 2), have been previously implicated in temperature-specific immune responses of *M. rotundata* (Xu and James, 2012). Additionally, increased levels of ROS have been associated with immune function because of free radical production during phagocytosis (Nappi and Vass, 1993), suggesting another cause for the up-regulation of the antioxidants highlighted above. Antioxidants have also been shown to play a role in limiting microbial growth (Broderick et al., 2009), again suggesting another link to increased expression of antioxidants.

### Conclusions

Our results suggest that rearing individuals under long-term overwintering conditions can lead to an accumulation of chill injury, damage to neural structures and/or defects in development, and a decrease in immune system function. When individuals are exposed to fluctuating temperatures after an extended period of chilling, insect survival increases dramatically. We have developed a working hypothesis, based on evidence from both the literature and this study, to explain the increased survival associated with fluctuating temperature exposure during chilling in *M. rotundata* (Fig. 4). In this model, exposure to fluctuating temperatures activates pathways functioning in oxidative stress response, ion homeostasis, metabolism and neurogenesis, leading to increased survival. This model not only supports current chill injury hypotheses, such as oxidative stress, ion imbalance, and impaired metabolic function by providing evidence for transcriptional responses, but also adds additional mechanisms such as neurological development/repair and increased immune function. While it is clear that exposure to fluctuating temperatures provides an enormous benefit to the organism and the mechanisms behind it

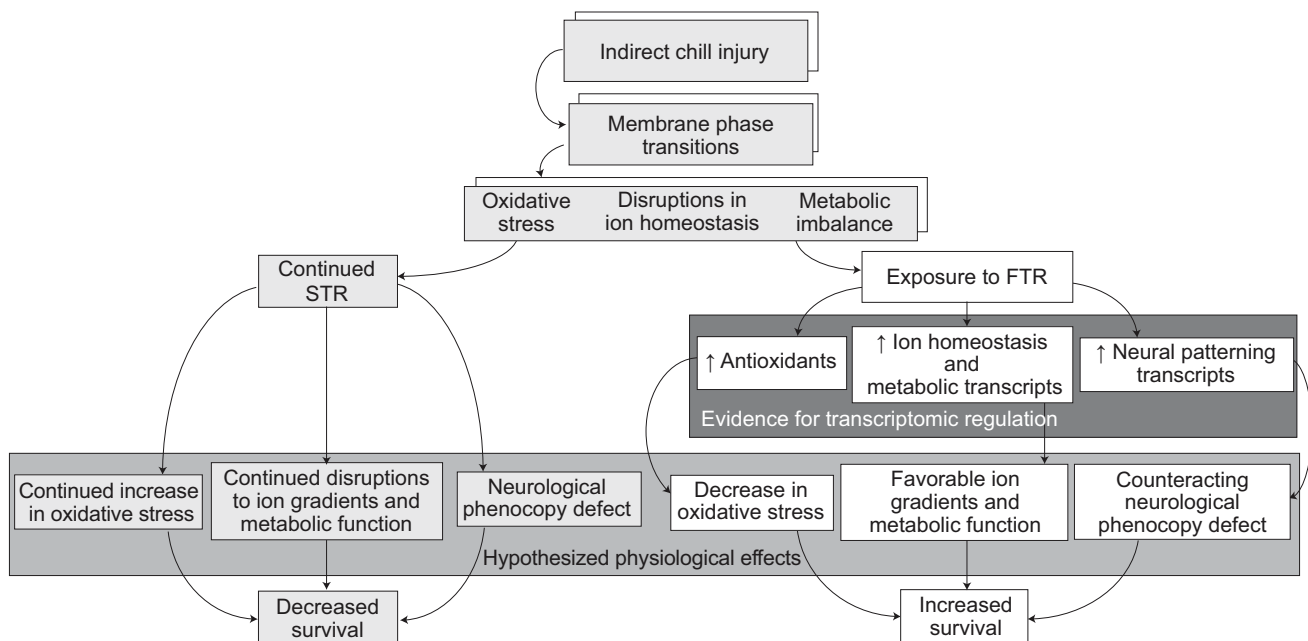

**Fig. 4. Current working hypothesis.** Evidence for transcriptional responses to fluctuating temperatures and the hypothesized physiological effects are depicted using boxes. Gray boxes indicate exposure to constant, chilled temperatures while white indicates individuals who have been transferred to fluctuating temperatures.

are beginning to be understood, it is still ambiguous whether these mechanisms act in a protective fashion, by slowing or stopping the accumulation of chill injury entirely, or by repairing chill injury caused by previous long-term exposure to low temperatures.

## MATERIALS AND METHODS

### Insects

All leafcutting bees (*Megachile rotundata* Fabricius 1787) for this project, derived from the 2009 field season, were purchased from JWM Leafcutter, Inc. (Nampa, ID) as loose cell bees and were of Canadian origin. Bees were stored at 6°C under constant darkness upon arrival.

### Temperature protocols

Cells containing bees were placed individually into the wells of 24-well culture plates, and housed in Percival model I-30BLL reach-in incubators. In April 2010, after 7 months of storage at constant temperatures, post-diapause quiescent prepupae were placed into a fluctuating temperature treatment or left at standard storage temperatures. The constant temperature regime consisted of a 6°C±0.5°C constant temperature with a 15 h:9 h (L:D) photoperiod. Bees reared under temperature fluctuations were exposed to 6°C with a daily warm pulse of 20°C. The warm pulse consisted of a 1 h ramp up to 20°C (0.23°C min<sup>-1</sup>), a 1 h incubation at 20°C and a 1 h ramp down, back to 6°C. Peak temperature occurred during the photophase of the 15 h:9 h light cycle. At monthly intervals, three of the 24-well culture plates were removed from the temperature treatments and placed at 29°C to initiate pupal development. Adult emergence rates were used to measure survival (as described in Rinehart et al., 2013).

### Library preparation and sequencing

Total RNA was collected from three postdiapause quiescent prepupae reared under either constant or fluctuating temperature treatments at an early and late timepoint in 2010 (12 bees total) using the Invitrogen TRIzol protocol (Carlsbad, CA, USA). To ensure that we were assessing response to low temperatures in both treatments, individuals for both treatments were harvested during the cold phase (6°C). RNA was stored as an ethanol precipitate at -80°C until needed. Samples were then dissolved in RNAase-free H<sub>2</sub>O and shipped at 1–10 µg total RNA at a concentration of no less than 20 ng µl<sup>-1</sup> on dry ice overnight to University Georgia.

RNA-seq libraries from both constant and fluctuating temperature treatments at both early and late time points in 2010 were prepared using Illumina TruSeq mRNA standard protocol at the University of Georgia Genomics Facility (Athens, GA, USA) and sequencing was outsourced to the University of Missouri Columbia DNA Sequencing Core facility (Columbia, MO, USA). The RNA samples were sequenced on a HiSeq2000, running HiSeq Control Software (HCS) v1.4.8. Samples were sequenced on two lanes of a HiSeq Flowcell v1.5 and libraries were clustered on a cBot v1.4.36.0 using Illumina's Truseq PE Cluster Kit v2.0 and sequenced using a 200 cycle TruSeq SBS HS v2 kit. The clustered flowcell was sequenced for 206 cycles, broken down into three separate reads. The first read was 100 cycles in length, followed by a six-cycle index read. Following the index read, paired-end resynthesis was performed also using Truseq PE Cluster Kit v2.0, which was then followed by another 100 cycles. Image analysis and base calling were performed using the standard Illumina Pipeline consisting of real-time analysis (RTA) version v1.12.4.2 and Casava v1.8 using the default settings.

### Differential expression analysis

Raw sequence data generated from the Illumina HiSeq2000 (Accession: SRP047335) were quality checked using FastQC (Version 0.10.1; Babraham Bioinformatics). The raw reads were aligned to the *M. rotundata* reference genome (accession number: PRJNA66515) using TopHat (v2.0.5). Mapped reads were assembled, with the aid of a GFF (v3) annotation file generated using the genome annotation pipeline MAKER (Cantarel et al., 2008), using Cufflinks (v2.0.2). The differential expression profiles were analyzed using Cuffdiff (v2.0.2) via the iPlant collaborative discovery environment (Stanzione, 2011). A threshold value of log<sub>2</sub>, (α≤0.05) was used to determine significance in the differential expression

analysis. The R package cummerbund (Trapnell et al., 2012) was used for downstream analysis and the generation of differential expression figures. The Venn diagram depicted in Fig. 3 was generated using the R package 'venn diagram' (Chen and Boutros, 2011) and the Java-based gene ontology enrichment and functional annotation program Blast2GO was used for GO and KEGG analysis (Conesa et al., 2005; Kanehisa et al., 2012).

### Quantitative real-time PCR

RNA samples for qPCR were collected from post-diapause quiescent bees during RNA-seq library preparation in one-month intervals between May 2010 and 2011 in the fashion described above. RNA samples were diluted to a concentration of 0.5 µg µl<sup>-1</sup> and then subjected to treatment with DNAase I (Invitrogen, Carlsbad, CA, USA) followed by first-strand cDNA synthesis using Super Script III first strand synthesis system for RT-PCR (Invitrogen). Three controls were used for this step: a 'no-template control', consisting of all enzymatic components except the RNA template, a 'negative RT control', lacking reverse transcriptase and a 'positive RT control', using a control RNA template.

qPCR was conducted on a LightCycler 480 (Roche, Indianapolis, IN, USA). SYBR Green I Master Mix with ROX (FastStart Universal, Indianapolis, IN, USA) protocol and reagents were used for the qPCR reactions. Primer design for all targets and reference genes was conducted using the IDR program from Integrated DNA Technologies (Coralville, IA, USA). qBasePLUS (Biogazelle, Ghent, Belgium) was used for analysis of the qPCR data.

### Acknowledgements

The authors would like to thank Marnie Larson of the USDA-ARS, Fargo, ND for her technical assistance. We also thank Gene Robinson, Karen Kapheim and the B10 consortium for access to the unpublished *Megachile rotundata* genome and for permission for early submission.

### Competing interests

The authors declare no competing or financial interests.

### Author contributions

G.D.Y., J.P.R. and W.P.K. conceived and designed the research plan. A.S.T. and G.D.Y. analyzed the RNA-seq data. A.S.T. conducted RT-qPCR validation of RNA-seq results. A.S.T., G.D.Y. and J.H.B. wrote and edited the manuscript. All authors contributed to and approved the content of the final manuscript.

### Funding

This research was funded by the United States Department of Agriculture, North Dakota State University NSF FORWARD Grant HRD-0811239 to J.H.B., a Gordon A. Larson Agricultural Research Grant from the North Dakota State University Development Foundation to J.H.B. and North Dakota State University Department of Biological Sciences.

### Supplementary material

Supplementary material available online at <http://jeb.biologists.org/lookup/suppl/doi:10.1242/jeb.113829/-/DC1>

### References

- Baek, K.-H. and Skinner, D. Z. (2003). Alteration of antioxidant enzyme gene expression during cold acclimation of near-isogenic wheat lines. *Plant Sci.* **165**, 1221–1227.
- Bennett, M. M., Petersen, K., Yocum, G., Rinehart, J., Kemp, W. P. and Greenlee, K. J. (2013). Effects of extended prepupal storage duration on adult flight physiology of the alfalfa leafcutting bee (Hymenoptera: Megachilidae). *J. Econ. Entomol.* **106**, 1089–1097.
- Broderick, N. A., Welchman, D. P. and Lemaître, B. (2009). Recognition and response to microbial infection in *Drosophila*. In *Insect Infection and Immunity* (ed. J. Rolff and S. E. Reynolds), pp. 13–33. New York: Oxford University Press.
- Cantarel, B. L., Korf, I., Robb, S. M. C., Parra, G., Ross, E., Moore, B., Holt, C., Sánchez Alvarado, A. and Yandell, M. (2008). MAKER: an easy-to-use annotation pipeline designed for emerging model organism genomes. *Genome Res.* **18**, 188–196.
- Chen, H. and Boutros, P. C. (2011). VennDiagram: a package for the generation of highly-customizable Venn and Euler diagrams in R. *BMC Bioinform.* **12**, 35.
- Colinet, H., Renault, D., Hance, T. and Vernon, P. (2006). The impact of fluctuating thermal regimes on the survival of a cold-exposed parasitic wasp, *Aphidius colemani*. *Physiol. Entomol.* **31**, 234–240.



- Conesa, A., Götz, S., García-Gómez, J. M., Terol, J., Talón, M. and Robles, M.** (2005). Blast2GO: a universal tool for annotation, visualization and analysis in functional genomics research. *Bioinformatics* **21**, 3674-3676.
- Corona, M., Velarde, R. A., Remolina, S., Moran-Lauter, A., Wang, Y., Hughes, K. A. and Robinson, G. E.** (2007). Vitellogenin, juvenile hormone, insulin signaling and queen honey bee longevity. *Proc. Natl. Acad. Sci. USA* **104**, 7128-7133.
- Coulson, S. J. and Bale, J. S.** (1996). Supercooling and survival of the beech leaf mining weevil *Rhynchaenus fagi* L. (Coleoptera: Curculionidae). *J. Insect Physiol.* **42**, 617-623.
- Goldschmidt, R.** (1935). Gen ed Auszen eigenschaft (Untersuchung an *Drosophila*) under II Zschr. *Vererbungslehre* **69**, 70-131.
- Hayward, S. A. L., Pavlides, S. C., Tammariello, S. P., Rinehart, J. P. and Denlinger, D. L.** (2005). Temporal expression patterns of diapause-associated genes in flesh fly pupae from the onset of diapause through post-diapause quiescence. *J. Insect Physiol.* **51**, 631-640.
- Hayward, S. A. L., Manso, B. and Cossins, A. R.** (2014). Molecular basis of chill resistance adaptations in poikilothermic animals. *J. Exp. Biol.* **217**, 6-15.
- Hazell, S. P. and Bale, J. S.** (2011). Low temperature thresholds: are chill coma and CT(min) synonymous? *J. Insect Physiol.* **57**, 1085-1089.
- Hosler, J. S., Burns, J. E. and Esch, H. E.** (2000). Flight muscle resting potential and species-specific differences in chill-coma. *J. Insect Physiol.* **46**, 621-627.
- Joanisse, D. and Storey, K.** (1996). Oxidative stress and antioxidants in overwintering larvae of cold-hardy goldenrod gall insects. *J. Exp. Biol.* **199**, 1483-1491.
- Kanehisa, M., Goto, S., Sato, Y., Furumichi, M. and Tanabe, M.** (2012). KEGG for integration and interpretation of large-scale molecular data sets. *Nucleic Acids Res.* **40**, D109-D114.
- Kemp, W. P. and Bosch, J.** (2000). Development and emergence of the alfalfa pollinator *Megachile rotundata* (Hymenoptera: Megachilidae). *Ann. Entomol. Soc. Am.* **93**, 904-911.
- Kostal, V.** (2004). On the nature of pre-freeze mortality in insects: water balance, ion homeostasis and energy charge in the adults of *Pyrrhocoris apterus*. *J. Exp. Biol.* **207**, 1509-1521.
- Košťál, V.** (2006). Eco-physiological phases of insect diapause. *J. Insect Physiol.* **52**, 113-127.
- Košťál, V., Yanagimoto, M. and Bastl, J.** (2006). Chilling-injury and disturbance of ion homeostasis in the coxal muscle of the tropical cockroach (*Nauphoeta cinerea*). *Comp. Biochem. Physiol. B Biochem. Mol. Biol.* **143**, 171-179.
- Košťál, V., Renault, D., Mehrabianová, A. and Bastl, J.** (2007). Insect cold tolerance and repair of chill-injury at fluctuating thermal regimes: role of ion homeostasis. *Comp. Biochem. Physiol. A Mol. Integr. Physiol.* **147**, 231-238.
- Lalouette, L., Williams, C. M., Hervant, F., Sinclair, B. J. and Renault, D.** (2011). Metabolic rate and oxidative stress in insects exposed to low temperature thermal fluctuations. *Comp. Biochem. Physiol. A Mol. Integr. Physiol.* **158**, 229-234.
- Lee, R. E.** (2010). *Low Temperature Biology of Insects, A primer on insect cold-tolerance* (ed. D. L. Denlinger and E. R. Lee), p. 4. Cambridge, NY: Cambridge University Press.
- Lochmiller, R. L. and Deerenberg, C.** (2000). Trade-offs in evolutionary immunology: just what is the cost of immunity? *Oikos* **88**, 87-98.
- Macmillan, H. A., Williams, C. M., Staples, J. F. and Sinclair, B. J.** (2012). Reestablishment of ion homeostasis during chill-coma recovery in the cricket *Gryllus pennsylvanicus*. *Proc. Natl. Acad. Sci. USA* **109**, 20750-20755.
- Michener, C. D.** (2007). *The Bees of the World*, p. 953. Baltimore, MD: Johns Hopkins University Press.
- Mitchell, H. K. and Lipps, L. S.** (1978). Heat shock and phenocopy induction in *Drosophila*. *Cell* **15**, 907-918.
- Mitchell, H. K., Moller, G., Petersen, N. S. and Lipps-Sarmiento, L.** (1979). Specific protection from phenocopy induction by heat shock. *Dev. Genet.* **1**, 181-192.
- Monaghan, P., Metcalfe, N. B. and Torres, R.** (2009). Oxidative stress as a mediator of life history trade-offs: mechanisms, measurements and interpretation. *Ecol. Lett.* **12**, 75-92.
- Nappi, A. J. and Vass, E.** (1993). Melanogenesis and the generation of cytotoxic molecules during insect cellular immune reactions. *Pigment Cell Res.* **6**, 117-126.
- Pitts-Singer, T. L. and Cane, J. H.** (2011). The alfalfa leafcutting bee, *Megachile rotundata*: the world's most intensively managed solitary bee. *Annu. Rev. Entomol.* **56**, 221-237.
- Prasad, T. K., Anderson, M. D., Martin, B. A. and Stewart, C. R.** (1994). Evidence for chilling-induced oxidative stress in maize seedlings and a regulatory role for hydrogen peroxide. *Plant Cell* **6**, 65-74.
- Renault, D., Nedved, O., Hervant, F. and Veron, P.** (2004). The importance of fluctuating thermal regimes for repairing chill injuries in the tropical beetle *Alphitobius diaperinus* (Coleoptera: Tenebrionidae) during exposure to low temperature. *Physiol. Entomol.* **29**, 139-145.
- Rinehart, J. P., Yocum, G. D., West, M. and Kemp, W. P.** (2011). A fluctuating thermal regime improves survival of cold-mediated delayed emergence in developing *Megachile rotundata* (Hymenoptera: Megachilidae). *J. Econ. Entomol.* **104**, 1162-1166.
- Rinehart, J. P., Yocum, G. D., Kemp, W. P. and Greenlee, K. J.** (2013). A fluctuating thermal regime improves long-term survival of quiescent prepupal *Megachile rotundata* (Hymenoptera: Megachilidae). *Apic. Soc. Insects* **106**, 1081-1088.
- Rojas, R. R. and Leopold, R. A.** (1996). Chilling injury in the housefly: evidence for the role of oxidative stress between pupariation and emergence. *Cryobiology* **33**, 447-458.
- Stanzione, D.** (2011). The iPlant collaborative: cyberinfrastructure to feed the world. *IEEE Comput. Soc.* **11**, 44-52.
- Teets, N. M. and Denlinger, D. L.** (2013). Physiological mechanisms of seasonal and rapid cold-hardening in insects. *Physiol. Entomol.* **38**, 105-116.
- Trapnell, C., Roberts, A., Goff, L., Pertea, G., Kim, D., Kelley, D. R., Pimentel, H., Salzberg, S. L., Rinn, J. L. and Pachter, L.** (2012). Differential gene and transcript expression analysis of RNA-seq experiments with TopHat and Cufflinks. *Nat. Protoc.* **7**, 562-578.
- Walker, D. W., Muffat, J., Rundel, C. and Benzer, S.** (2006). Report overexpression of a *Drosophila* homolog of apolipoprotein D leads to increased stress resistance and extended lifespan. *Curr. Biol.* **16**, 674-679.
- Whitfield, G. H. and Richards, K. W.** (1992). Temperature-dependent development and survival of immature stages of the alfalfa leafcutter bee, *Megachile rotundata* (Hymenoptera: Megachilidae). *Apidologie* **23**, 11-23.
- Xu, J. and James, R. R.** (2012). Temperature stress affects the expression of immune response genes in the alfalfa leafcutting bee, *Megachile rotundata*. *Insect Mol. Biol.* **21**, 269-280.
- Yocum, G. D., Zoarek, J. A. N., Joplin, K. H., Jr, Lee, R. E., Smith, D. C., Manter, K. D. and Denlinger, D. L.** (1994). Alteration of the eclosion rhythm and eclosion behavior in the flesh fly, *Sarcophaga crassipalpis*, by low and high temperature stress. *J. Insect Physiol.* **40**, 13-21.
- Yocum, G. D., Kemp, W. P., Bosch, J. and Knoblett, J. N.** (2005). Temporal variation in overwintering gene expression and respiration in the solitary bee *Megachile rotundata*. *J. Insect Physiol.* **51**, 621-629.
- Yocum, G. D., Kemp, W. P., Bosch, J. and Knoblett, J. N.** (2006). Thermal history influences diapause development in the solitary bee *Megachile rotundata*. *J. Insect Physiol.* **52**, 1113-1120.
